# Supplementary material for: Ultrasonic and microwave assisted extraction as rapid and efficient techniques for plant mediated synthesis of quantum dots: green synthesis, characterization of zinc telluride and comparison study of some biological activities
Source: Royal Society of Chemistry journal article supplement (doi:10.1039/c9nj03144h), 2019-01-01
Supplement: c9nj03144h1.pdf [file c9nj03144h1.pdf]

## Electronic Supplementary Material

### Ultrasonic and microwave assisted extraction as rapid and efficient techniques for plant mediated synthesis of quantum dots: Green synthesis, characterization of zinc telluride and comparison study of some biological activities

**Zinab Moradi Alvand<sup>a</sup>, Hamid Reza Rajabi<sup>a,\*</sup>, Ali Mirzaei<sup>b,\*</sup>, Asad Masoumiasl<sup>c</sup>**

*a Chemistry Department, Yasouj University, Yasouj, 75918-74831, Iran.*

*b Medicinal Plant Research Center, Yasouj University of Medical sciences, Yasouj, Iran.*

*c Department of Agronomy and Plant Breeding, Faculty of Agriculture, Yasouj University, Yasouj 75918-74831, Iran.*

\*Corresponding authors. Tel. /Fax: +98 74 33242164.

E-mail address: h.rajabi@mail.yu.ac.ir, hr.rajabi@gmail.com (H.R. Rajabi),  
mirzaee3a2003@yahoo.com (A. Mirzaei)

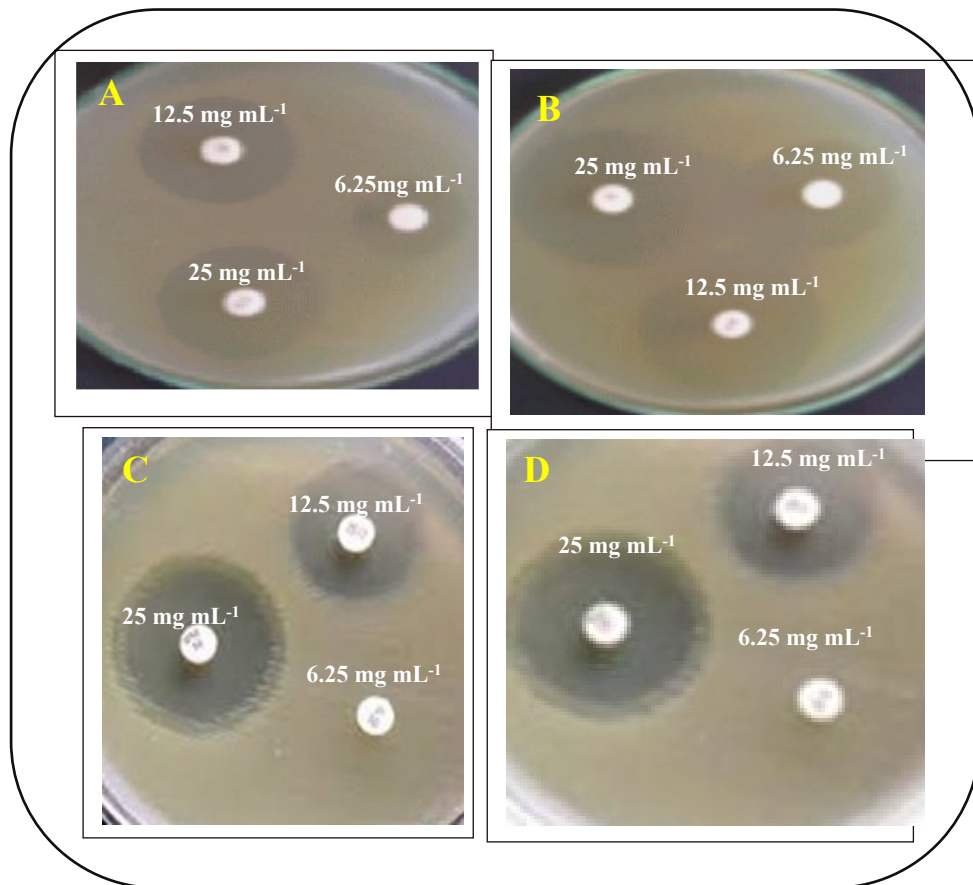

Fig. S1. Antibacterial activity of ZnTe QDs against (a) *Pseudomonas Aeruginosa* (b) *Escherichia Coli* (c) *Staphylococcus aureus* and (d) *Bacillus Subtilis*

Table S1: The antibacterial activity (inhibition zones, mm) of control antibiotics

| Antibiotic                             | <i>Preudomonas<br/>Oeruginosa</i> | <i>Escerichia<br/>Coli</i> | <i>Staphylococcus<br/>oureus</i> | <i>Bacillus<br/>Subtilis</i> |
|----------------------------------------|-----------------------------------|----------------------------|----------------------------------|------------------------------|
| Amoxicillin (25µg disk <sup>-1</sup> ) | 18.78                             | 22.42                      | 33.74                            | 26.00                        |
| Kanamycin (10 µg disk <sup>-1</sup> )  | 19.32                             | 15.80                      | 15.62                            | 20.94                        |
| Cephalexin (30 µg disk <sup>-1</sup> ) | 16.32                             | 17.94                      | 13.62                            | 15.80                        |

Table S2. The results of antimicrobial activity caused by samples by disk diffusion method.

| Compound        | Gram-negative                        |       |       |                         |       |       | Gram-positive                        |       |       |                          |       |       |       |
|-----------------|--------------------------------------|-------|-------|-------------------------|-------|-------|--------------------------------------|-------|-------|--------------------------|-------|-------|-------|
|                 | <i>pseudomonas aeruginosa</i>        |       |       | <i>Escherichia Coli</i> |       |       | <i>Staphylococcus aureus</i>         |       |       | <i>Bacillus Subtilis</i> |       |       |       |
|                 | Concentration (mg mL <sup>-1</sup> ) |       |       |                         |       |       | Concentration (mg mL <sup>-1</sup> ) |       |       |                          |       |       |       |
|                 | 6.25                                 | 12.5  | 25    | 6.25                    | 12.5  | 25    | 6.25                                 | 12.5  | 25    | 6.25                     | 12.5  | 25    |       |
| Aqueous extract | 90 W                                 | 8.40  | 9.60  | 10.50                   | 7.20  | 10.00 | 10.30                                | 7.40  | 8.50  | 9.90                     | 8.00  | 9.30  | 10.70 |
|                 | 270 W                                | 9.10  | 10.50 | 11.30                   | 7.60  | 10.20 | 11.30                                | 8.70  | 9.40  | 10.20                    | 8.00  | 9.30  | 10.80 |
|                 | USAE                                 | 9.00  | 10.30 | 11.30                   | 7.30  | 10.00 | 11.00                                | 8.30  | 9.00  | 9.60                     | 8.50  | 9.20  | 10.70 |
| ZnTe QDs        | 90W                                  | 10.00 | 10.95 | 11.45                   | 8.05  | 9.95  | 10.55                                | 8.00  | 8.95  | 10.05                    | 8.01  | 8.80  | 10.01 |
|                 | 270W                                 | 12.40 | 13.00 | 14.53                   | 11.06 | 12.00 | 13.05                                | 8.20  | 10.00 | 12.20                    | 8.90  | 9.68  | 11.66 |
|                 | USAE                                 | 12.60 | 13.30 | 15.00                   | 11.06 | 12.09 | 14.08                                | 11.07 | 13.01 | 15.01                    | 8.01  | 8.01  | 10.00 |
|                 | uncoated ZnTe                        | 9.60  | 10.30 | 11.00                   | 10.56 | 11.30 | 14.08                                | 12.07 | 14.07 | 15.05                    | 10.06 | 12.08 | 13.05 |

Table S3. Minimal Inhibitory Concentration (MIC) and Minimal Bactericidal Concentration (MBC) (in mg mL<sup>-1</sup>) of samples against pathogenic bacteria

| Compound<br>(mg mL <sup>-1</sup> ) |          | Gram-negative                 |      |                         |      | Gram-positive                |      |                          |      |
|------------------------------------|----------|-------------------------------|------|-------------------------|------|------------------------------|------|--------------------------|------|
|                                    |          | <i>pseudomonas aeruginosa</i> |      | <i>Escherichia Coli</i> |      | <i>Staphylococcus aureus</i> |      | <i>Bacillus Subtilis</i> |      |
|                                    |          | MBC                           | MIC  | MBC                     | MIC  | MBC                          | MIC  | MBC                      | MIC  |
| Aqueous Extract                    | 90W      | 2.50                          | 0.02 | 2.00                    | 0.04 | 1.56                         | 0.04 | 1.43                     | 0.07 |
|                                    | 270W     | 2.50                          | 0.02 | 0.98                    | 0.05 | 0.93                         | 0.05 | 0.72                     | 0.04 |
|                                    | USAE     | 2.90                          | 0.00 | 1.01                    | 0.05 | 1.56                         | 0.03 | 1.00                     | 0.05 |
| ZnTe QDS                           | 90W      | 1.50                          | 0.03 | 0.65                    | 0.08 | 1.00                         | 0.06 | 0.98                     | 0.78 |
|                                    | 270W     | 1.50                          | 0.03 | 0.00                    | 1.00 | 1.58                         | 0.03 | 0.06                     | 0.73 |
|                                    | USAE     | 3.05                          | 0.00 | 0.98                    | 0.6  | 1.68                         | 0.02 | 0.06                     | 0.73 |
|                                    | Uncoated | 1.40                          | 0.04 | 1.00                    | 0.05 | 0.72                         | 0.04 | 0.98                     | 0.05 |

Table S4. Cytotoxic results of samples by *Artemia uramiana* a Brime Shrimp Lethality assay.

| Samples            |                  | Mortality percentage                              |     |     |     |      | LC <sub>50</sub><br>24h | Confidence<br>Interval<br>(95%) | St.<br>Error |
|--------------------|------------------|---------------------------------------------------|-----|-----|-----|------|-------------------------|---------------------------------|--------------|
|                    |                  | At different concentration (µg mL <sup>-1</sup> ) |     |     |     |      |                         |                                 |              |
|                    |                  | 100                                               | 250 | 500 | 750 | 1000 |                         |                                 |              |
| Aqueous<br>Extract | 270 W            | 0                                                 | 5   | 8   | 20  | 25   | 1346                    | 1168-1574                       | 117          |
|                    | 90 W             | 0                                                 | 8   | 10  | 18  | 26   | 1412                    | 1135-1688                       | 141          |
|                    | USAE             | 5                                                 | 10  | 15  | 22  | 30   | 1439                    | 1107-1772                       | 170          |
| ZnTe QDs           | 270 W            | 0                                                 | 15  | 18  | 24  | 36   | 1228                    | 1019-1437                       | 107          |
|                    | 90 W             | 10                                                | 25  | 30  | 33  | 37   | 1310                    | 933-1685                        | 192          |
|                    | USAE             | 0                                                 | 21  | 26  | 28  | 33   | 1285                    | 1006-1563                       | 142          |
| Control            | Plant<br>extract | 6                                                 | 10  | 19  | 27  | 38   | 1207                    | 991-1423                        | 110          |
|                    | ZnTe<br>QDs      | 10                                                | 15  | 25  | 35  | 40   | 1155                    | 933-1377                        | 113          |

Table S5: Mitotic index of *A. cepa* root tips exposed to different concentrations of aqueous extract of *Ficus Johannis* in comparison to EMS as positive control.

|                    | Treatment groups                 | Concentration           | cells | Dividing cells | MI (%) |
|--------------------|----------------------------------|-------------------------|-------|----------------|--------|
|                    | Tap water<br>(as normal control) | ----                    | 1000  | 255 ± 26       | 25.5   |
|                    | EMS                              | 12 Mm                   | 1000  | 55 ± 17        | 5.5    |
| Aqueous<br>Extract | 90W                              | 500 µg mL <sup>-1</sup> | 1000  | 242 ± 22       | 24.2   |
|                    | 270W                             | 500 µg mL <sup>-1</sup> | 1000  | 233 ± 25       | 23.3   |
|                    | USAE                             | 500 µg mL <sup>-1</sup> | 1000  | 240 ± 18       | 24.0   |
| ZnTe QDs           | 90W                              | 500 µg mL <sup>-1</sup> | 1000  | 222 ± 22       | 22.2   |
|                    | 270W                             | 500 µg mL <sup>-1</sup> | 1000  | 229 ± 25       | 22.9   |
|                    | USAE                             | 500 µg mL <sup>-1</sup> | 1000  | 224 ± 31       | 22.4   |

Ethyl methanesulfonate (EMS, (MI): Mitotic index. Data are expressed as Mean ± S.D

Table S6. The root length average of *A. cepa* of Zinc telluride solutions and *F. Johannis* in extracts at 96 hours

| sample         | Average Root Growth | The observed change compared to control (%) |
|----------------|---------------------|---------------------------------------------|
| Control        | 4.5±0.80            | 100.0                                       |
| Extract; 90 W  | 2.87±1.00           | 63.1                                        |
| Extract; 270 W | 3.90±0.10           | 86.6                                        |
| Extract; USAE  | 4.00±1.05           | 88.8                                        |
| ZnTe; 90 W     | 2.00±1.08           | 44.4                                        |
| ZnTe; 270 W    | 1.98±1.00           | 44.0                                        |
| ZnTe; USAE     | 2.5±1.03            | 55.5                                        |



Table S 7: The *A. cepa* root length morphology of Zinc telluride solutions and *F. Johannisin* extracts at 96 hours

| Sample              | Root and morphology |              |            | The color of the end |      |            |
|---------------------|---------------------|--------------|------------|----------------------|------|------------|
|                     | Hook shape          | Flower onion | Broken end | Right                | Pale | Dark/Brown |
| Negative control    | -                   | -            | -          | +                    | -    | -          |
| Positive control    | +                   | +            | +          | -                    | +    | +          |
| Extract; MWAE-90 W  | -                   | -            | -          | +                    | -    | -          |
| Extract; MWAE-270 W | -                   | -            | -          | +                    | -    | -          |
| Extract USAE        | -                   | -            | -          | +                    | +    | -          |
| ZnTe; MWAE-90 W     | +                   | +            | -          | +                    | -    | -          |
| ZnTe; MWAE-270 W    | -                   | +            | -          | +                    | -    | -          |
| ZnTe USAE           | -                   | +            | -          | +                    | -    | -          |
